# Supplementary material
Source: PubMed Central journal article supplement (PMC9998290)
Supplement: mmc1.pdf [file mmc1.pdf]

**Cell Reports, Volume 42**

**Supplemental information**

**Coronavirus subverts ER-phagy  
by hijacking FAM134B and ATL3 into p62  
condensates to facilitate viral replication**

**Xuan Tan, Kun Cai, Jiajia Li, Zhen Yuan, Ruifeng Chen, Hurong Xiao, Chuanrui Xu, Bing Hu, Yali Qin, and Binbin Ding**

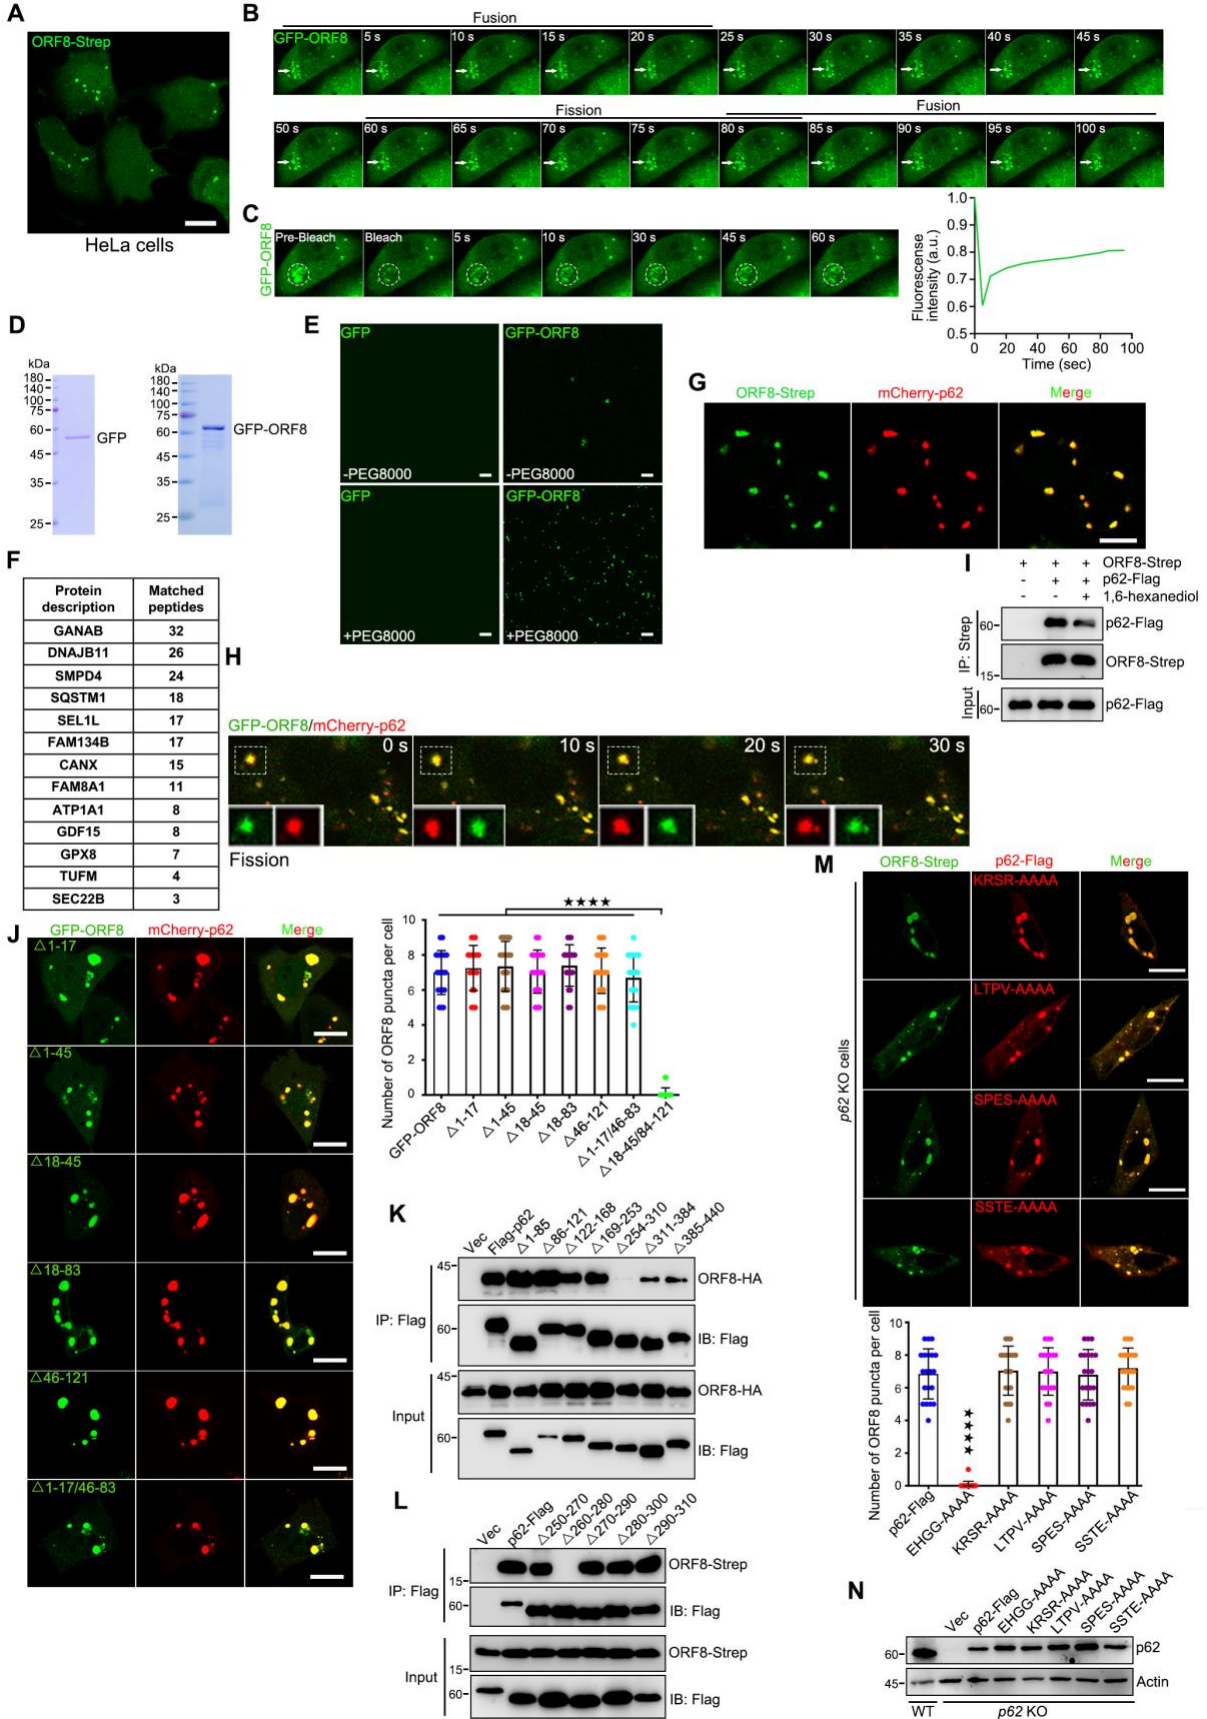

2 **Figure S1. SARS-CoV-2 ORF8 interacts with p62. Related to Figure 1.**  
3 (A) Cells were transfected with ORF8-Strep for 24 h, then stained with anti-Strep antibody  
4 and imaged by confocal microscopy. Scar bar represents 10  $\mu$ m.  
5 (B) GFP-ORF8 puncta undergo fusion and fission, images are shown at indicated  
6 timepoints after imaging.  
7 (C) HeLa cells with exogenous expression of GFP-ORF8 undergo liquid-like behavior--  
8 fluorescence recovery after photobleaching (FRAP), images are shown before and at  
9 indicated timepoints after bleaching. Time 0 indicates the time of photobleaching.  
10 Quantification of fluorescence intensity recovery of GFP-ORF8 in the bleached droplet.  
11 (D) GFP and GFP-ORF8 were purified from *Escherichia Coli* BL21 and analyzed via  
12 Coomassie Blue.  
13 (E) *In vitro* phase separation assay of GFP or GFP-ORF8. Fluorescence images of 10  $\mu$ M  
14 GST-GFP or 10  $\mu$ M GST-GFP-ORF8 in phase separation assay buffer with or without 10%  
15 PEG8000. Representative images of three independent experiments are shown. Scar bar,  
16 10  $\mu$ m.  
17 (F) HEK293T expressing ORF8-Flag cells were harvested and subjected to Flag IP,  
18 followed by MS to identify ORF8-binding proteins.  
19 (G) Cells were co-transfected with ORF8-Strep and mCherry-p62 for 24 h, then stained  
20 with anti-Strep antibody and imaged by confocal microscopy. Scar bar represents 10  $\mu$ m.  
21 (H) HeLa cells with exogenous expression of GFP-ORF8 and mCherry-p62 undergo fission,  
22 images are shown at indicated timepoints after imaging.  
23 (I) Analysis of interaction between ORF8 and p62 under 1,6-hexanediol treatment by co-IP  
24 assay with Strep antibody.  
25 (J) Analysis of colocalization of GFP-ORF8 or deleted mutants with mCherry-p62 by  
26 confocal microscopy. Scar bar represents 10  $\mu$ m.  
27 (K and L) Analysis of interaction of p62-Flag or deleted mutants with ORF8-Strep using co-  
28 IP assay.  
29 (M) p62 KO cells were transfected with indicated plasmids, followed by analysis of the  
30 colocalization of p62-Flag and point mutants with ORF8-Strep with anti-Flag and anti-Strep  
31 antibodies by confocal microscopy. Scar bar represents 10  $\mu$ m.  
32 (N) Lysates from (M) were analyzed via WB.

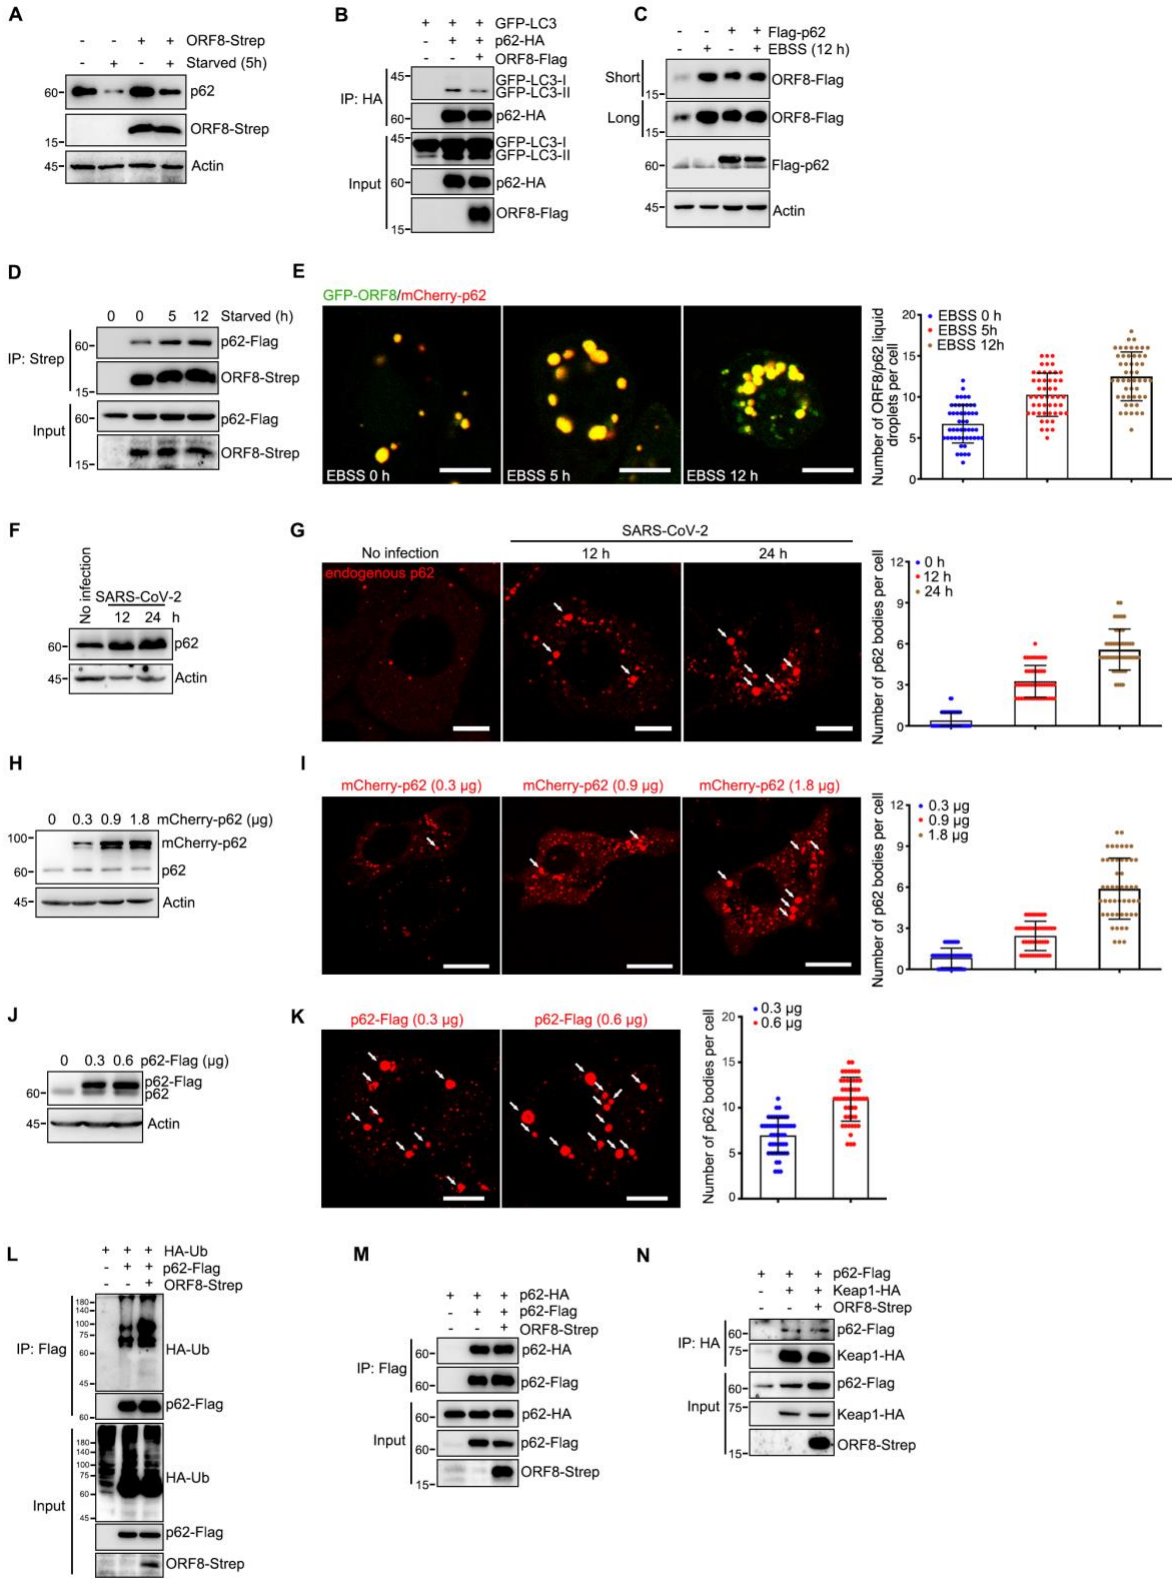

34 **Figure S2. ORF8 inhibits Autophagic degradation of p62. Related to Figure 1.**  
35 (A) HeLa cells were transfected with vector or ORF8-Strep and starved for 5 h. Endogenous  
36 p62 was analyzed via WB.  
37 (B) Analysis of interaction between GFP-LC3 and p62-HA with ORF8-Flag overexpression  
38 by co-IP assay.  
39 (C) HeLa cells stably expressing ORF8-Flag were transfected with vector or Flag-p62 and  
40 then starved for 5 h. Endogenous protein level of p62 was analyzed via WB.  
41 (D) Analysis of interaction between p62-Flag and ORF8-Strep under starvation for indicated  
42 time by co-IP assay.  
43 (E) HeLa cells were transfected with GFP-ORF8 and mCherry-p62 and starved in EBSS  
44 for indicated time. Cells were analyzed via confocal microscopy. Scar bar, 10  $\mu\text{m}$ . The large  
45 size ( $>1 \mu\text{m}$ ) of p62 bodies were counted from 50 cells of three independent experiments.  
46 (F and G) Vero-E6 cells were non-infected or infected with SARS-CoV-2 for indicated time.  
47 Endogenous p62 was analyzed via WB (F) and confocal microscopy (G) with anti-p62  
48 antibody. Scar bar, 10  $\mu\text{m}$ . The large size ( $>1 \mu\text{m}$ ) of p62 bodies were counted from 50  
49 cells of three independent experiments.  
50 (H and I) HeLa cells were transfected with gradient mCherry-p62 and analyzed via WB (H)  
51 and confocal microscopy (I). Scar bar, 10  $\mu\text{m}$ . The large size ( $>1 \mu\text{m}$ ) of p62 bodies were  
52 counted from 50 cells of three independent experiments.  
53 (J and K) HeLa cells were transfected with gradient p62-Flag and analyzed via WB (J) and  
54 confocal microscopy (K) with anti-Flag antibody. Scar bar, 10  $\mu\text{m}$ . The large size ( $>1 \mu\text{m}$ )  
55 of p62 bodies were counted from 50 cells of three independent experiments.  
56 (L-N) Analysis of interaction between p62-Flag and HA-Ub (L), p62-Flag and p62-HA (M),  
57 p62-Flag and Keap1-HA (N) under ORF8-Strep overexpression by co-IP assay.

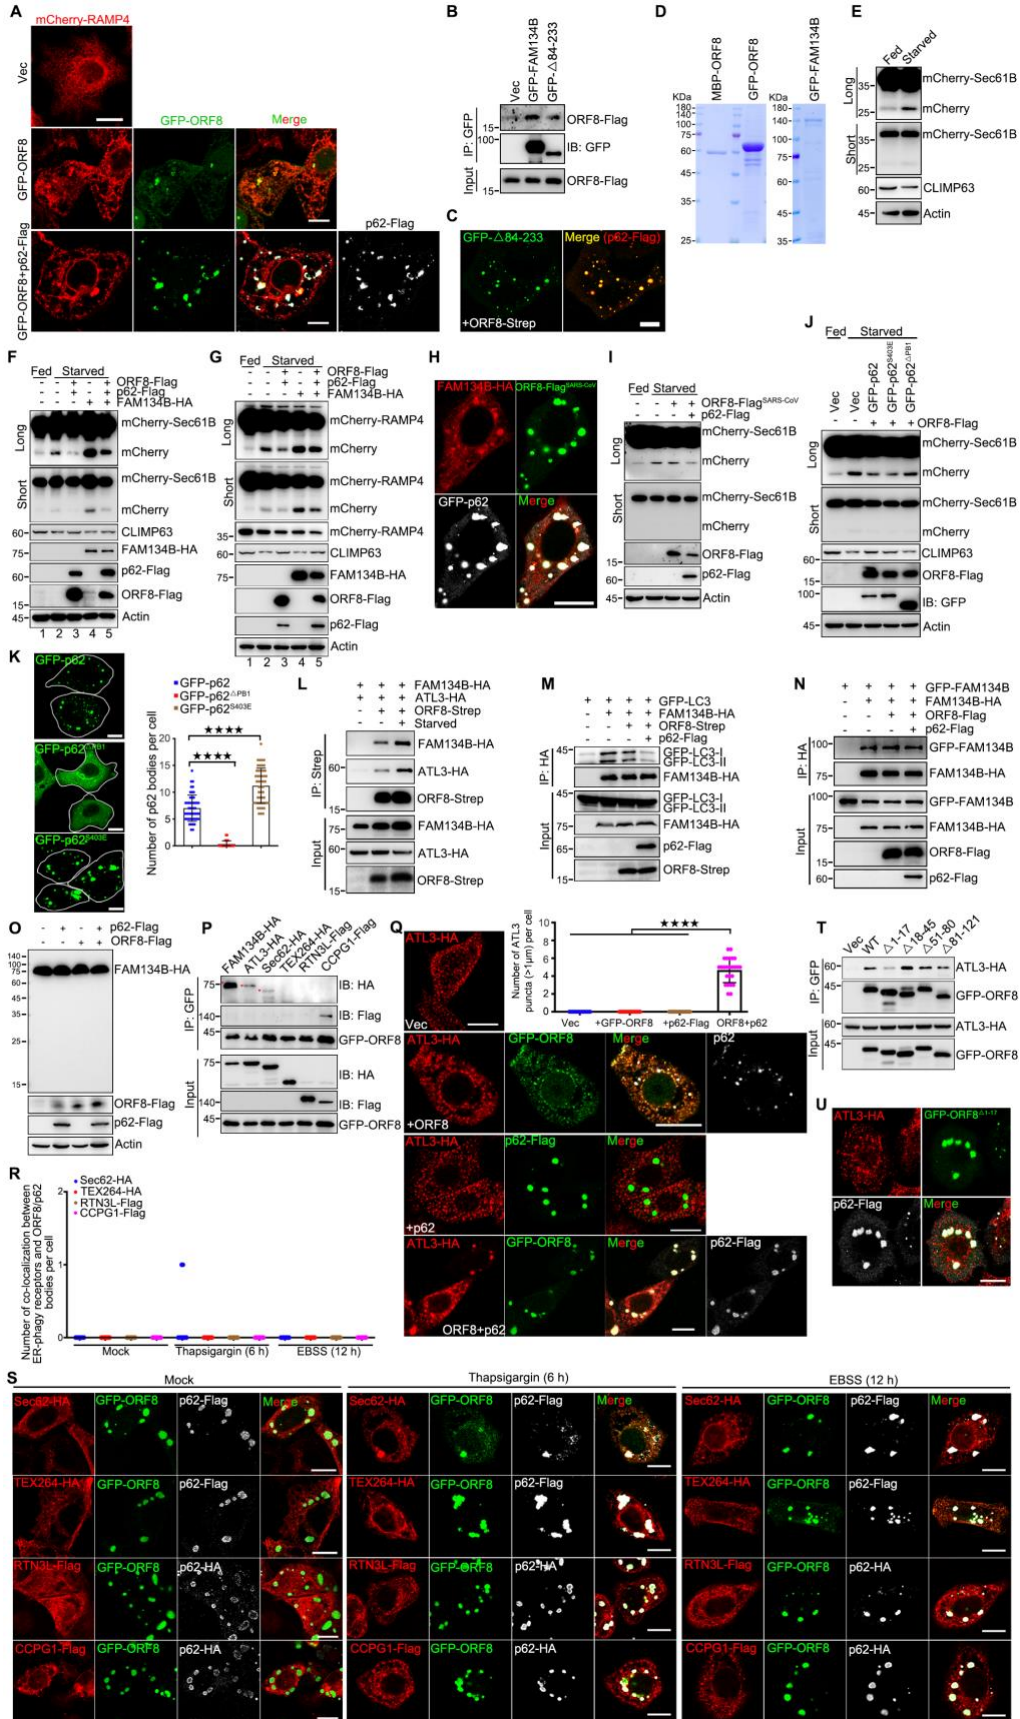

59 **Figure S3. ORF8/p62 condensates inhibit ER-phagy. Related to Figure 2.**  
60 (A) HeLa cells expressing mCherry-RAMP4 were transfected with vector or GFP-ORF8 or  
61 GFP-ORF8 and p62-Flag for 24 h and analyzed via confocal microscopy. Scar bar  
62 represents 10  $\mu\text{m}$ .  
63 (B) Analysis of interaction of ORF8-Flag with GFP-FAM134B or mutant by co-IP assay.  
64 (C) HeLa cells were transfected with GFP-FAM134B $\Delta^{84-233}$ , ORF8-Strep and p62-Flag.  
65 Analysis of colocalization of GFP-FAM134B $\Delta^{84-233}$  with ORF8/p62 bodies by confocal  
66 microscopy with Flag antibody. Scar bar represents 10  $\mu\text{m}$ .  
67 (D) MBP-ORF8, GST-GFP-ORF8, and GST-GFP-FAM134B were purified from *Escherichia*  
68 *Coli* BL21 and analyzed via Coomassie Blue.  
69 (E) U2OS cells expressing mCherry-Sec61B were starved in EBSS for 12 h. Lysates were  
70 analyzed via WB.  
71 (F) U2OS cells expressing mCherry-Sec61B were transfected with indicated plasmids for  
72 24 h and then starved in EBSS for 12 h. Lysates were analyzed via WB.  
73 (G) U2OS cells expressing mCherry-RAMP4 were transfected with indicated plasmids for  
74 24 h and then starved in EBSS for 12 h. Lysates were analyzed via WB.  
75 (H) HeLa cells were transfected with FAM134B-HA and SARS-CoV ORF8-Flag and GFP-  
76 p62 for 24 h and analyzed via confocal microscopy with anti-HA and anti-Flag antibodies.  
77 Scar bar represents 10  $\mu\text{m}$ .  
78 (I) U2OS cells expressing mCherry-Sec61B were transfected with indicated plasmids for  
79 24 h and then starved in EBSS for 12 h. Lysates were analyzed via WB.  
80 (J) U2OS cells expressing mCherry-Sec61B were transfected with indicated plasmids for  
81 24 h and then starved in EBSS for 12 h. Lysates were analyzed via WB.  
82 (K) HeLa cells were transfected with GFP-p62 or mutants for 24 h and imaged by confocal  
83 microscopy. Scar bar represents 10  $\mu\text{m}$ . The large size ( $>1 \mu\text{m}$ ) of p62 bodies were counted  
84 from 50 cells of three independent experiments.  
85 (L) Analysis of interaction between ORF8-Strep and FAM134B-HA or ATL3-HA with  
86 starvation treatment by co-IP assay.  
87 (M) Analysis of interaction between GFP-LC3 and FAM134B-HA with ORF8 and p62 co-  
88 expression by co-IP assay.  
89 (N) Analysis of self-interaction between GFP-FAM134B and FAM134B-HA with ORF8 and  
90 p62 co-expression by co-IP assay.  
91 (O) U2OS cells were transfected with indicated plasmids and analyzed the specific  
92 cleavage of FAM134B via WB.  
93 (P) Co-IP assay for interaction between ORF8 and ER-phagy receptors in HEK293T cells.  
94 (Q) Immunofluorescence of cells expressing ATL3-HA or ATL3-HA and GFP-ORF8 or  
95 ATL3-HA, p62-Flag and GFP-ORF8 with anti-HA and anti-Flag antibodies. Scar bar, 10  $\mu\text{m}$ .  
96 (R) The number of co-localization between ER-phagy receptors and ORF8/p62 bodies in  
97 each cell from (S) was counted from 20 cells of two independent experiments.  
98 (S) HeLa cells expressing GFP-ORF8 and p62-Flag or p62-HA were transfected with ER-  
99 phagy receptors for 24 h and analyzed via confocal microscopy with anti-HA and anti-Flag  
100 antibodies. Immunofluorescence imaging displayed localization between ER-phagy  
101 receptors and ORF8/p62 puncta under different treatment. Scar bar, 10  $\mu\text{m}$ .  
102 (T) GFP-ORF8 truncations were expressed as indicated with ATL3-HA. Cell lysates were  
103 subjected to immunoprecipitation with GFP antibody and analyzed via WB.

104 (U) HeLa cells were transfected with GFP-ORF8 truncation with ATL3-HA and p62-Flag for  
105 24 h, then stained with anti-HA and anti-Flag antibodies and imaged by confocal  
106 microscopy. Scar bar represents 10  $\mu$ m.



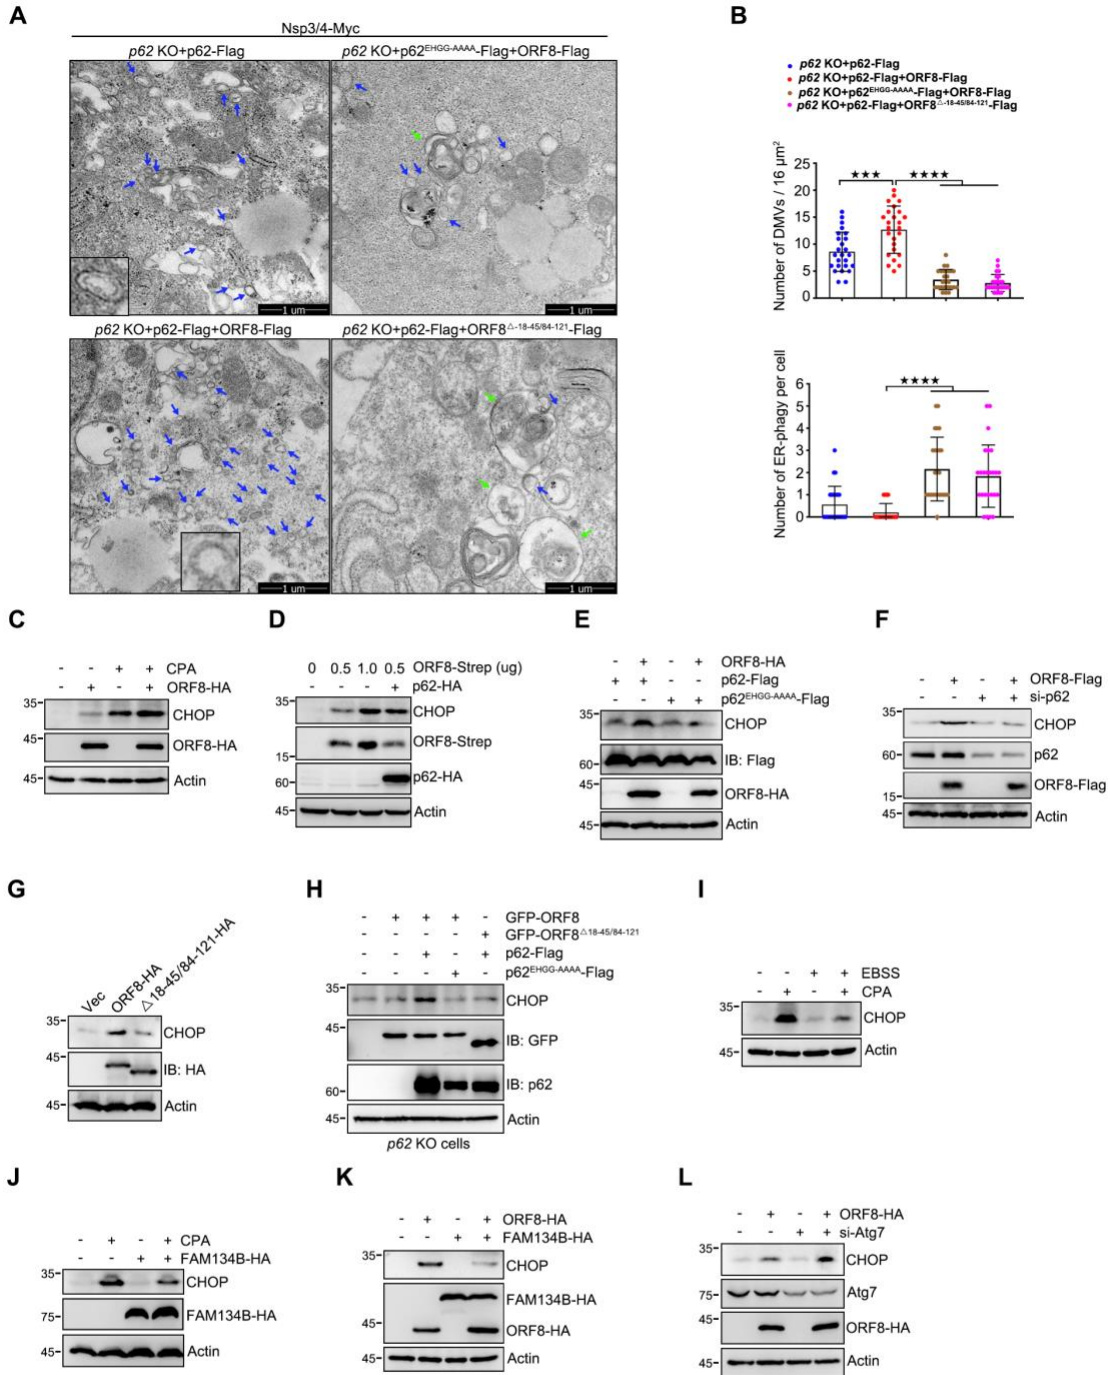

108 **Figure S4. ORF8/p62 condensates inhibit ER-phagy, promote DMVs production, and**  
109 **induce ER stress. Related to Figure 3.**

110 (A) p62 KO Vero-E6 cells expressing Nsp3/4-Myc were transfected with WT or p62<sup>EHGG-</sup>  
111 <sup>AAAA</sup> with ORF8-Flag or ORF8<sup>Δ18-45/84-121</sup>-Flag for 36 h and then analyzed via transmission  
112 electron microscopy. The DMV structures (blue arrowhead) and ER-phagy (green  
113 arrowhead) are shown.

114 (B) The number of DMV and ER-phagy in each cell was counted from 25 cells of two  
115 independent experiments. Two-tailed Unpaired Student's t-test, \*\*\**P* < 0.001, \*\*\*\**P* <  
116 0.0001.

117 (C) Cell lysates were collected from HEK293T cells transfected with ORF8-HA and ER  
118 stress marker CHOP was analyzed via WB. CPA treatment for 12 h was used as positive  
119 control.

120 (D) HEK293T cells were transfected with dose-dependent expression of ORF8-Strep with  
121 or without p62-HA for 24 h. Lysates were analyzed via WB.

122 (E) HEK293T cells were transfected with p62-Flag or point mutant with or without ORF8-  
123 HA for 24 h. Lysates were analyzed via WB.

124 (F) HEK293T cells were transfected with control or p62 siRNA with or without ORF8-Flag.  
125 Lysates were analyzed via WB.

126 (G) HEK293T cells were transfected with ORF8-HA and deleted mutant for 24 h. Lysates  
127 were analyzed via WB.

128 (H) p62 KO Vero-E6 cells were transfected with p62-Flag or point mutant with or without  
129 ORF8-HA or deleted mutant for 24 h. Lysates were analyzed via WB.

130 (I) HEK293T cells were treated with CPA and/or EBSS. Lysates were analyzed via WB.

131 (J) HEK293T cells were transfected with vector or FAM134B-HA with or without CPA  
132 treatment. Lysates were analyzed via WB.

133 (K) HEK293T cells were transfected with vector or FAM134B-HA with or without ORF8-HA  
134 for 24 h. Lysates were analyzed via WB.

135 (L) HEK293T cells were transfected with control or Atg7 siRNA with or without ORF8-HA.  
136 Lysates were analyzed via WB.
